# Supplementary material for: Can nitrous acid contribute to atmospheric new particle formation from nitric acid and water?
Source: Royal Society of Chemistry journal article supplement (doi:10.1039/d0nj02992k), 2020-01-01
Supplement: d0nj02992k1.pdf [file d0nj02992k1.pdf]

**Supplementary data**

**Can nitrous acid contribute to atmospheric new particle  
formation from nitric acid and water?**

Shuang Ni<sup>A</sup>, Feng-Yang Bai<sup>B</sup>, Xiu-Mei Pan<sup>A\*</sup>

<sup>A</sup> Institute of Functional Material Chemistry, National & Local United Engineering Lab for Power  
Battery, Faculty of Chemistry, Northeast Normal University, Changchun 130024, People's  
Republic of China

<sup>B</sup> Institute of Catalysis for Energy and Environment, College of Chemistry and Chemical  
Engineering, Shenyang Normal University, Shenyang 110034, People's Republic of China

---

\* *Xiu-mei Pan*

*Institute of Functional Material Chemistry, National & Local United Engineering Lab for  
Power Battery, Faculty of Chemistry, Northeast Normal University, 130024, Changchun, People's  
Republic of China*

*Tel.: +86-431-85099291; Fax: +86-431-85098768*



Table S1 shows MAE, MES and MaxE of the binding energies calculated through M06-2X method along with three different basis sets (6-311G(d,p), 6-311+G(2d,p) and 6-311++G(3df,3dp)) and the single point energy calculations are treated with MP2/cc-pVTZ level on the basis of the DFT results on five reactions:

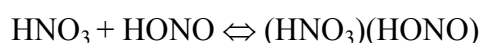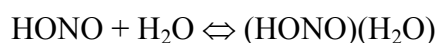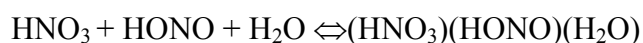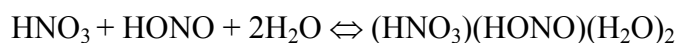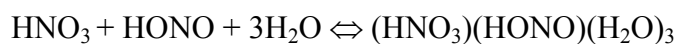

MAE, MES and MaxE of M06-2X are almost smallest except a few values in comparison with the results of the other DFT methods, whereas the PW91PW91 is inapposite. It is easy to find the single point energy performed on MP2/cc-pVTZ is extremely close to ones of CCSD(T)/6-311++G(d,p) observed from Table S1, whose MAE maximum is 0.485 kcal/mol and MaxE maximum is 1.280 kcal/mol. The three error values are diminished obviously by replacing 6-311G (d,p) to 6-311+G(2d,p), nevertheless the reduction appears awfully confined by replacing 6-311+G(2d,p) to 6-

311++G(3df,3dp).

**Table S1.** MAE, MES and MaxE<sup>a</sup> of the binding energies calculated on three methods and three levels and the binding energies obtained from the single point energy calculations on the MP2/cc-pVTZ on the basis of the DFT results on the five reactions.

| Method and basis set                           | MAE   | MES    | MaxE   |
|------------------------------------------------|-------|--------|--------|
| M06-2X/6-311G(d,p)                             | 7.524 | -7.524 | 13.523 |
| MP2/cc-pVTZ//M06-2X/6-311G(d,p)                | 0.362 | -0.362 | 0.465  |
| PW91PW91/6-311G (d,p)                          | 9.672 | -9.672 | 20.663 |
| MP2/cc-pVTZ//PW91PW91/6-311G(d,p)              | 0.485 | -0.485 | 0.890  |
| $\omega$ B97X-D/6-311G(d,p)                    | 8.642 | 6.924  | 10.120 |
| MP2/cc-pVTZ/ $\omega$ B97X-D/6-311G(d,p)       | 0.396 | -0.396 | 0.575  |
| M06-2X/6-311+G(2d,p)                           | 0.535 | -0.535 | 1.146  |
| MP2/cc-pVTZ//M06-2X/6-311+G(2d,p)              | 0.246 | -0.136 | 0.585  |
| PW91PW91/6-311+G(2d,p)                         | 0.902 | -0.476 | 2.372  |
| MP2/cc-pVTZ//PW91PW91/6-311+G(2d,p)            | 0.336 | -0.336 | 1.280  |
| $\omega$ B97X-D/6-311+G(2d,p)                  | 0.851 | 0.694  | 1.691  |
| MP2/cc-pVTZ/ $\omega$ B97X-D/6-311+G(2d,p)     | 0.266 | -0.266 | 0.643  |
| M06-2X/6-311++G(3df,3dp)                       | 0.462 | 0.282  | 1.639  |
| MP2/cc-pVTZ//M06-2X/6-311++G(3df,3dp)          | 0.246 | -0.172 | 0.581  |
| PW91PW91/6-311++G(3df,3dp)                     | 0.597 | 0.382  | 0.980  |
| MP2/cc-pVTZ//PW91PW91/6-311++G(3df,3dp)        | 0.286 | 0.196  | 0.820  |
| $\omega$ B97X-D/6-311++G(3df,3dp)              | 1.439 | 1.439  | 2.784  |
| MP2/cc-pVTZ/ $\omega$ B97X-D/6-311++G(3df,3dp) | 0.266 | -0.192 | 0.636  |

<sup>a</sup> MAE, MES and MaxE donate the mean absolute error, the mean effective error and the maximum error

respectively, taking single point energy on CCSD(T)/6-311++G(d,p) as criterion.

**Table S2.** The binding energies ( $\Delta E$ ), enthalpy energies ( $\Delta H$ ) and Gibbs free energies ( $\Delta G$ ) at 298.15 K, for isomers of  $(\text{HNO}_3)(\text{HONO})(\text{H}_2\text{O})_n$  ( $n=1,2,3$ ) (in kcal/mol) at MP2/cc-pVTZ//M06-2X/6-311+G(2d,p) level.

| Isomers | $\Delta E$ | $\Delta H$ | $\Delta G$ |
|---------|------------|------------|------------|
| I-1     | -17.18     | -17.27     | 0.19       |
| I-2     | -16.96     | -17.21     | 0.76       |
| II-1    | -27.41     | -28.61     | 1.25       |
| II-2    | -26.56     | -27.58     | 0.97       |
| II-3    | -26.31     | -27.51     | 3.02       |
| II-4    | -25.97     | -26.88     | 1.49       |
| II-5    | -25.96     | -26.88     | 1.54       |
| II-6    | -26.88     | -28.09     | 3.49       |
| II-7    | -25.95     | -25.83     | 3.26       |
| II-8    | -25.83     | -25.80     | 2.86       |
| III-1   | -34.76     | -36.44     | 2.46       |
| III-2   | -34.64     | -36.06     | 2.15       |
| III-3   | -32.56     | -34.26     | 3.06       |
| III-4   | -34.16     | -35.82     | 2.76       |
| III-5   | -33.90     | -33.72     | 3.15       |
| III-6   | -33.76     | -35.62     | 4.82       |
| III-7   | -33.18     | -34.36     | 2.72       |
| III-8   | -32.96     | -34.43     | 3.96       |

**Table S3.** The binding energies ( $\Delta E$ ), enthalpy energies ( $\Delta H$ ) and Gibbs free energies ( $\Delta G$ ) at 298.15 K, for isomers of  $(\text{HNO}_3)(\text{HONO})(\text{H}_2\text{O})_n$  ( $n=4$ ) (in kcal/mol) at MP2/cc-pVTZ//M06-2X/6-311+G(2d,p) level.

| Isomers | $\Delta E$ | $\Delta H$ | $\Delta G$ |
|---------|------------|------------|------------|
| IV-1    | -45.33     | -47.79     | 1.02       |
| IV-2    | -44.94     | -41.07     | 1.52       |
| IV-3    | -43.95     | -46.56     | 3.84       |
| IV-4    | -43.94     | -46.55     | 3.88       |
| IV-5    | -44.45     | -47.05     | 2.96       |
| IV-6    | -43.03     | -45.27     | 2.36       |
| IV-7    | -43.07     | -45.22     | 2.40       |
| IV-8    | -44.67     | -47.52     | 3.15       |
| IV-9    | -43.10     | -45.44     | 3.06       |
| IV-10   | -42.94     | -44.95     | 0.23       |
| IV-11   | -43.11     | -45.51     | 3.96       |
| IV-12   | -44.27     | -46.53     | 3.33       |

**Table S4.** The binding energies ( $\Delta E$ ), enthalpy energies ( $\Delta H$ ) and Gibbs free energies ( $\Delta G$ ) at 298.15 K, for isomers of  $(\text{HNO}_3)(\text{HONO})(\text{H}_2\text{O})_n$  ( $n=5$ ) (in kcal/mol) at MP2/cc-pVTZ//M06-2X/6-311+G(2d,p) level.

| Isomers | $\Delta E$ | $\Delta H$ | $\Delta G$ |
|---------|------------|------------|------------|
| V-1     | -54.48     | -58.16     | 4.12       |
| V-2     | -54.30     | -57.81     | 4.31       |
| V-3     | -54.12     | -57.53     | 3.79       |
| V-4     | -53.84     | -57.26     | 4.12       |
| V-5     | -52.92     | -56.37     | 4.65       |
| V-6     | -54.11     | -57.67     | 4.29       |
| V-7     | -53.67     | -57.17     | 4.02       |
| V-8     | -53.31     | -56.67     | 4.75       |
| V-9     | -52.24     | -55.37     | 2.82       |
| V-10    | -52.65     | -55.80     | 3.95       |
| V-11    | -53.17     | -56.77     | 5.61       |
| V-12    | -52.72     | -56.12     | 4.92       |



**Table S5.** The binding energies ( $\Delta E$ ), enthalpy energies ( $\Delta H$ ) and Gibbs free energies ( $\Delta G$ ) at 298.15 K, for isomers of  $(\text{HNO}_3)(\text{HONO})(\text{H}_2\text{O})_n$  ( $n=6$ ) (in kcal/mol) at MP2/cc-pVTZ//M06-2X/6-311+G(2d,p) level.

| Isomers | $\Delta E$ | $\Delta H$ | $\Delta G$ |
|---------|------------|------------|------------|
| VI-1    | -66.74     | -70.13     | 2.23       |
| VI-2    | -66.61     | -65.09     | 4.12       |
| VI-3    | -64.41     | -65.10     | 4.60       |
| VI-4    | -64.52     | -69.06     | 3.96       |
| VI-5    | -65.56     | -70.18     | 3.32       |
| VI-6    | -64.59     | -69.61     | 3.41       |
| VI-7    | -64.42     | -69.60     | 4.36       |
| VI-8    | -64.42     | -69.67     | 3.22       |
| VI-9    | -65.06     | -69.86     | 4.93       |
| VI-10   | -65.03     | -69.93     | 4.78       |
| VI-11   | -65.07     | -69.98     | 4.83       |
| VI-12   | -65.07     | -69.98     | 4.80       |

**Table S6.** The Gibbs free energies 298.15 K, for isomers of  $(\text{HNO}_3)(\text{H}_2\text{O})_n$  ( $n=1-6$ )

(in kcal/mol) at MP2/cc-pVTZ//M06-2X/6-311+G(2d,p) level.

| cluster                  | $\Delta G$ |
|--------------------------|------------|
| $\text{HNO}_3\text{-W}$  | -0.43      |
| $\text{HNO}_3\text{-2W}$ | -1.05      |
| $\text{HNO}_3\text{-3W}$ | -1.23      |
| $\text{HNO}_3\text{-4W}$ | 0.70       |
| $\text{HNO}_3\text{-5W}$ | 1.13       |
| $\text{HNO}_3\text{-6W}$ | 0.71       |

**Table S7.** The binding energies ( $\Delta E$ ), enthalpy energies ( $\Delta H$ ) and Gibbs free energies ( $\Delta G$ ) at 298.15 K, for isomers of  $(\text{HNO}_3)(\text{HONO})(\text{H}_2\text{O})_n$  ( $n=7-10, 15, 20$ ) (in kcal/mol) at M06-2X/6-311+G(2d,p) level.

| Clusters                                                       | $\Delta E$  | $\Delta H$  | $\Delta G$ |
|----------------------------------------------------------------|-------------|-------------|------------|
| 7<br>(HNO <sub>3</sub> )(HONO)(H <sub>2</sub> O)               | -71.94      | -77.23      | 1.53       |
| 8<br>(HNO <sub>3</sub> )(HONO)(H <sub>2</sub> O)               | -80.61      | -87.03      | 2.66       |
| 9<br>(HNO <sub>3</sub> )(HONO)(H <sub>2</sub> O)               | -87.36      | -93.73      | 4.16       |
| 10<br>(HNO <sub>3</sub> )(HONO)(H <sub>2</sub> O)              | -94.06      | -<br>101.36 | 5.64       |
| ) <sub>15</sub><br>(HNO <sub>3</sub> )(HONO)(H <sub>2</sub> O) | -<br>151.95 | -<br>164.42 | 2.38       |
| 20<br>(HNO <sub>3</sub> )(HONO)(H <sub>2</sub> O)              | -<br>192.94 | -<br>209.15 | 1.35       |

**Table S8.** The AIM parameters including Density of all electrons  $\rho(r)$ , Laplacian density  $\nabla^2\rho(r)$ , Lagrangian kinetic energy  $G(r)$ , Potential energy density  $V(r)$  and Energy density  $H(r)$  for the clusters at M06-2X/6-311+G(2d,p) level (in a.u.).

| Conformer         | BCP    | I-1   | II-1  | III-1        | IV-1   | V-1   | VI-1   |
|-------------------|--------|-------|-------|--------------|--------|-------|--------|
|                   | Number |       |       |              |        |       |        |
| $\rho(r)$         | 1      | 0.013 | 0.020 | <b>0.037</b> | 0.067  | 0.040 | 0.038  |
|                   | 2      | 0.045 | 0.048 | 0.070        | 0.020  | 0.058 | 0.025  |
|                   | 3      | 0.035 | 0.024 | 0.044        | 0.032  | 0.033 | 0.025  |
|                   | 4      |       | 0.069 | 0.033        | 0.044  | 0.050 | 0.072  |
|                   | 5      |       |       | 0.020        | 0.054  | 0.011 | 0.036  |
|                   | 6      |       |       |              | 0.028  | 0.029 | 0.031  |
|                   | 7      |       |       |              | 0.016  | 0.030 | 0.050  |
|                   | 8      |       |       |              | 0.012* | 0.034 | 0.029  |
|                   | 9      |       |       |              |        |       | 0.013* |
|                   | 10     |       |       |              |        |       | 0.029  |
|                   | 11     |       |       |              |        |       | 0.022  |
| $\nabla^2\rho(r)$ | 1      | 0.060 | 0.091 | 0.130        | 0.144  | 0.130 | 0.130  |
|                   | 2      | 0.143 | 0.146 | 0.148        | 0.081  | 0.146 | 0.108  |
|                   | 3      | 0.125 | 0.097 | 0.143        | 0.124  | 0.126 | 0.100  |
|                   | 4      |       | 0.146 | 0.131        | 0.142  | 0.143 | 0.145  |
|                   | 5      |       |       | 0.091        | 0.148  | 0.039 | 0.129  |
|                   | 6      |       |       |              | 0.113  | 0.115 | 0.120  |
|                   | 7      |       |       |              | 0.073  | 0.116 | 0.144  |
|                   | 8      |       |       |              | 0.039* | 0.122 | 0.115  |
|                   | 9      |       |       |              |        |       | 0.048* |
|                   | 10     |       |       |              |        |       | 0.114  |
|                   | 11     |       |       |              |        |       | 0.092  |
| $G(r)$            | 1      | 0.013 | 0.019 | 0.033        | 0.054  | 0.035 | 0.033  |

|             |    |        |        |              |         |        |         |
|-------------|----|--------|--------|--------------|---------|--------|---------|
|             | 2  | 0.040  | 0.042  | 0.057        | 0.017   | 0.049  | 0.024   |
|             | 3  | 0.031  | 0.022  | 0.039        | 0.029   | 0.030  | 0.022   |
|             | 4  |        | 0.056  | 0.031        | 0.039   | 0.043  | 0.058   |
|             | 5  |        |        | 0.019        | 0.046   | 0.009  | 0.032   |
|             | 6  |        |        |              | 0.026   | 0.027  | 0.028   |
|             | 7  |        |        |              | 0.015   | 0.027  | 0.043   |
|             | 8  |        |        |              | 0.008*  | 0.030  | 0.026   |
|             | 9  |        |        |              |         |        | 0.010*  |
|             | 10 |        |        |              |         |        | 0.026   |
|             | 11 |        |        |              |         |        | 0.020   |
| <hr/>       |    |        |        |              |         |        |         |
| <i>V(r)</i> | 1  | -0.010 | -0.016 | -0.033       | -0.073  | -0.037 | -0.034  |
|             | 2  | -0.044 | -0.047 | -0.076       | -0.014  | -0.061 | -0.020  |
|             | 3  | -0.030 | -0.019 | -0.043       | -0.028  | -0.029 | -0.020  |
|             | 4  |        | -0.076 | -0.030       | -0.042  | -0.050 | -0.080  |
|             | 5  |        |        | -0.015       | -0.056  | -0.008 | -0.032  |
|             | 6  |        |        |              | -0.024  | -0.025 | -0.027  |
|             | 7  |        |        |              | -0.012  | -0.025 | -0.050  |
|             | 8  |        |        |              | -0.007* | -0.029 | -0.024  |
|             | 9  |        |        |              |         |        | -0.008* |
|             | 10 |        |        |              |         |        | -0.024  |
|             | 11 |        |        |              |         |        | -0.017  |
| <hr/>       |    |        |        |              |         |        |         |
| <i>H(r)</i> | 1  | 0.003  | 0.003  | <b>0.000</b> | -0.018  | -0.002 | -0.001  |
|             | 2  | -0.004 | -0.005 | -0.020       | 0.003   | -0.012 | 0.003   |
|             | 3  | 0.000  | 0.003  | -0.003       | 0.001   | 0.001  | 0.003   |
|             | 4  |        | -0.020 | 0.001        | -0.003  | -0.007 | -0.022  |
|             | 5  |        |        | 0.004        | -0.009  | 0.001  | 0.000   |
|             | 6  |        |        |              | 0.002   | 0.002  | 0.001   |
|             | 7  |        |        |              | 0.003   | 0.002  | -0.007  |
|             | 8  |        |        |              | 0.002*  | 0.001  | 0.002   |
|             | 9  |        |        |              |         |        | 0.002*  |
|             | 10 |        |        |              |         |        | 0.002   |

\* N-H···O is expressed by “\*”, and the others are O-H···O.

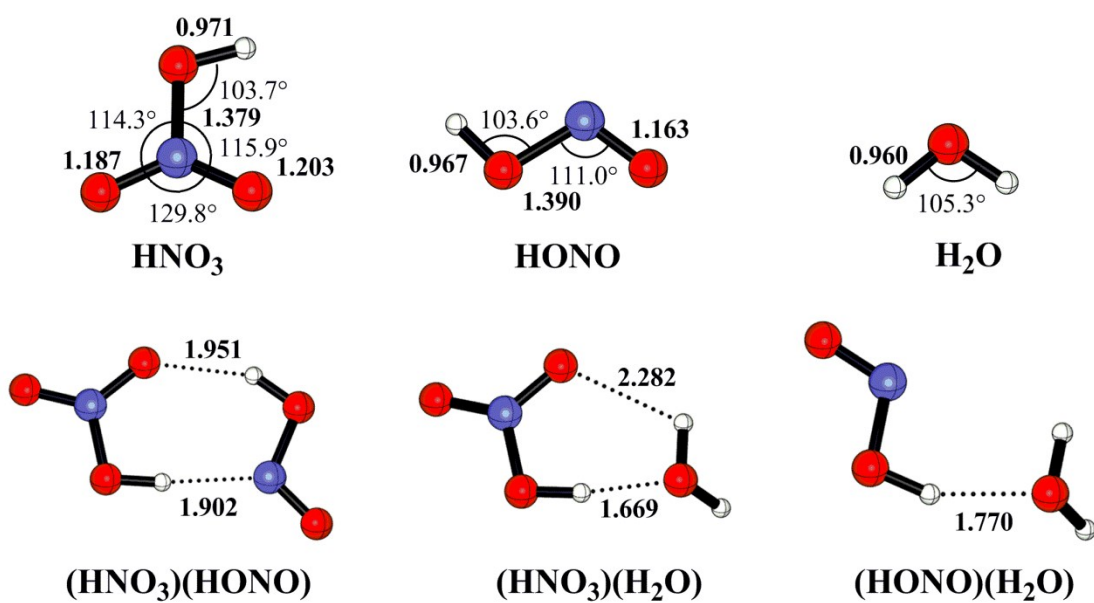

**Figure S1.** The geometrical configurations of monomers HNO<sub>3</sub>, HONO and H<sub>2</sub>O and dimers optimized at M06-2X/6-311+G(2d,p) level.

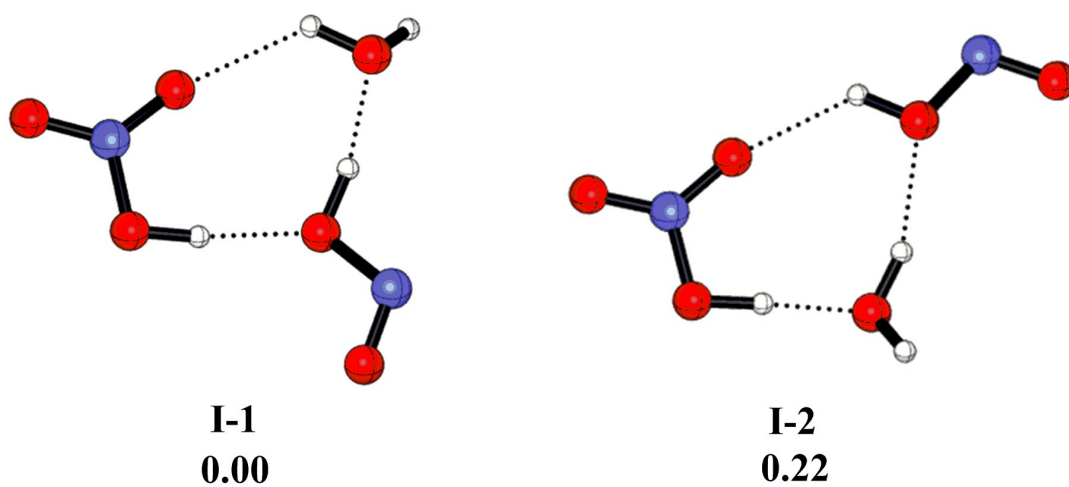

**Figure S2.** The geometrical configurations of  $(\text{HNO}_3)(\text{HONO})(\text{H}_2\text{O})$  optimized at the M06-2X/6-311+G(2d,p) level. The underlying figures are relative binding energies compared with the I-1 (in kcal/mol).



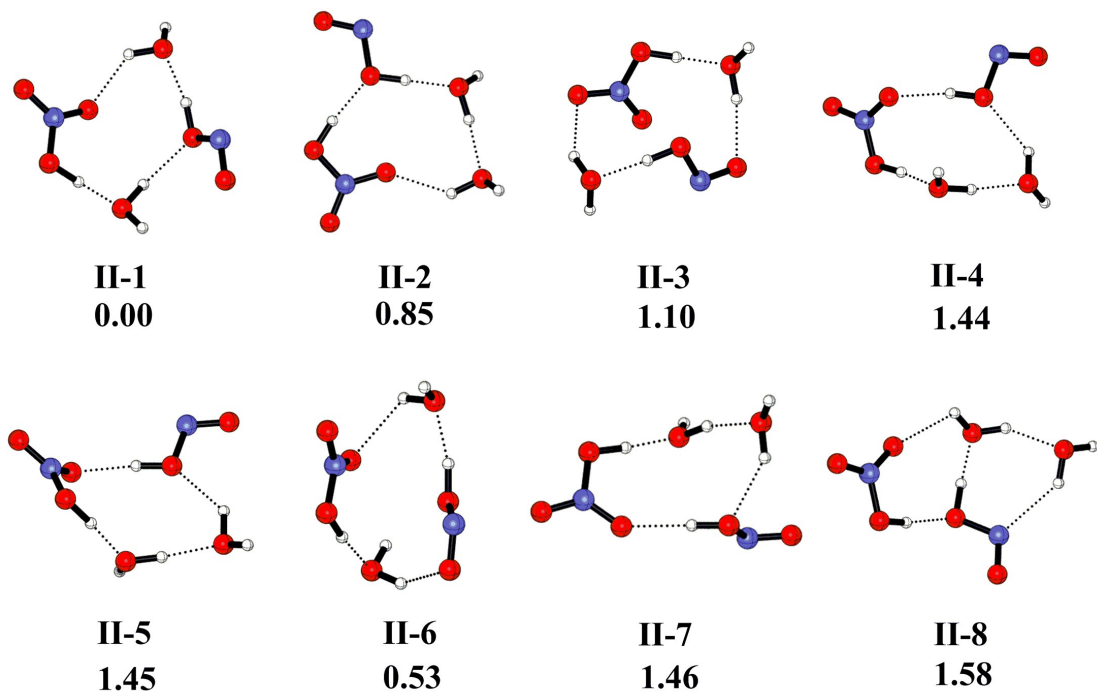

**Figure S3.** The geometrical configurations of  $(\text{HNO}_3)(\text{HONO})(\text{H}_2\text{O})_2$  optimized at the M06-2X/6-311+G(2d,p) level. The underlying figures are relative binding energies compared with the II-1 (in kcal/mol).

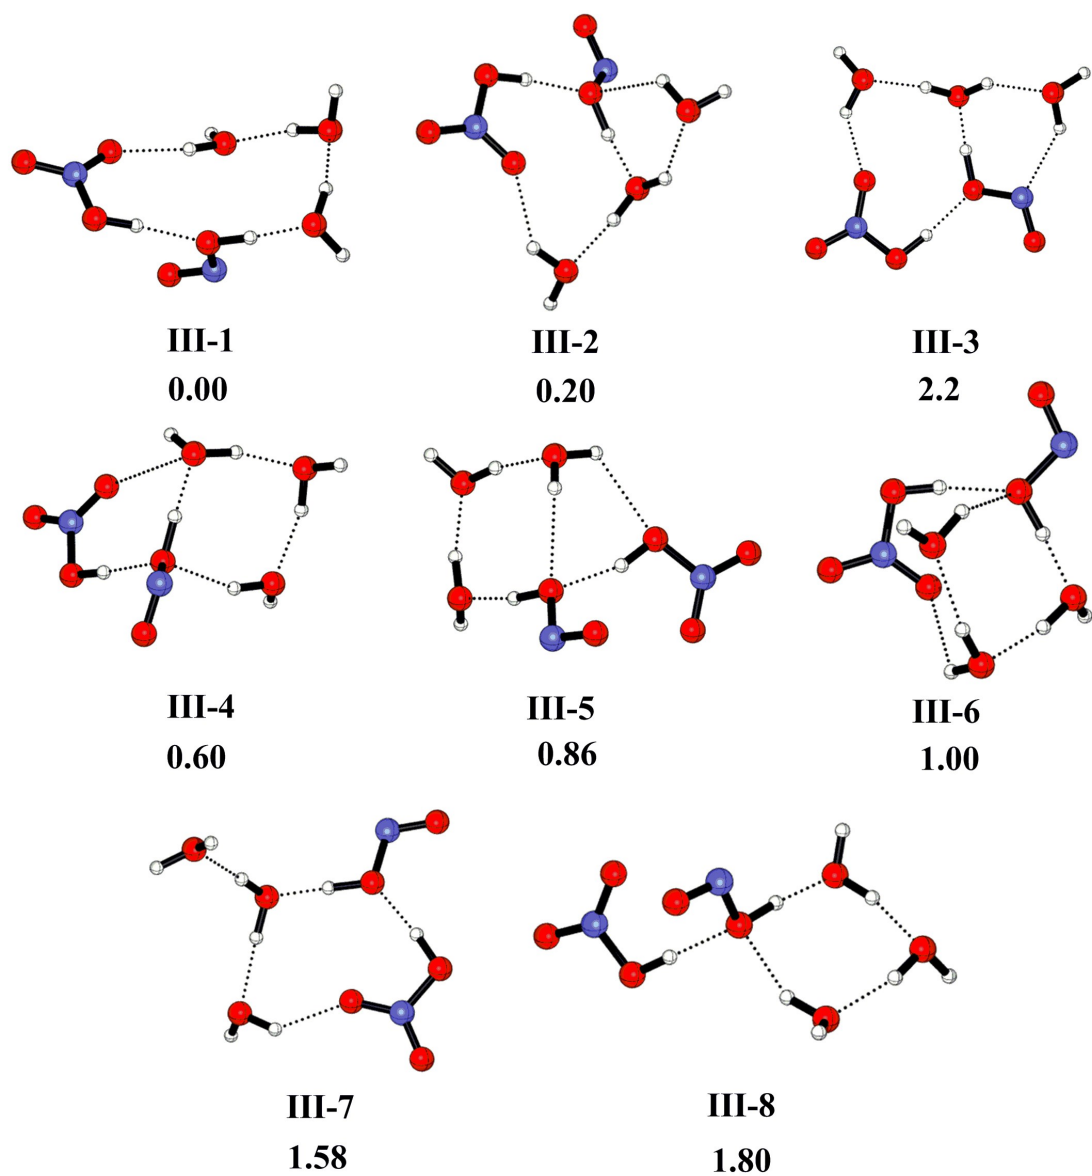

**Figure S4.** The geometrical configurations of  $(\text{HNO}_3)(\text{HONO})(\text{H}_2\text{O})_3$  optimized at the M06-2X/6-311+G(2d,p) level. The underlying figures are relative binding energies compared with the III-1 (in kcal/mol).

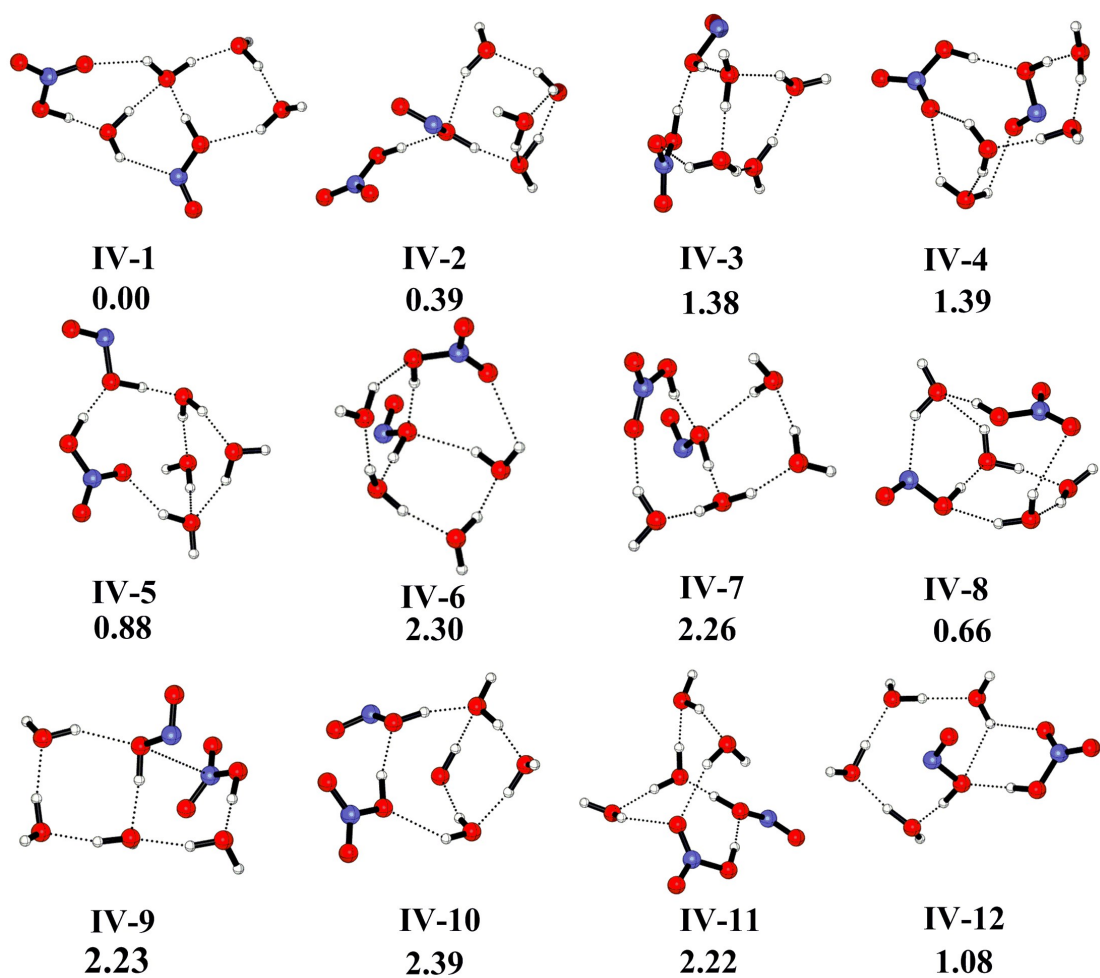

**Figure S5.** The geometrical configurations of  $(\text{HNO}_3)(\text{HONO})(\text{H}_2\text{O})_4$  optimized at the M06-2X/6-311+G(2d,p) level. The underlying figures are relative binding energies compared with the IV-1 (in kcal/mol).

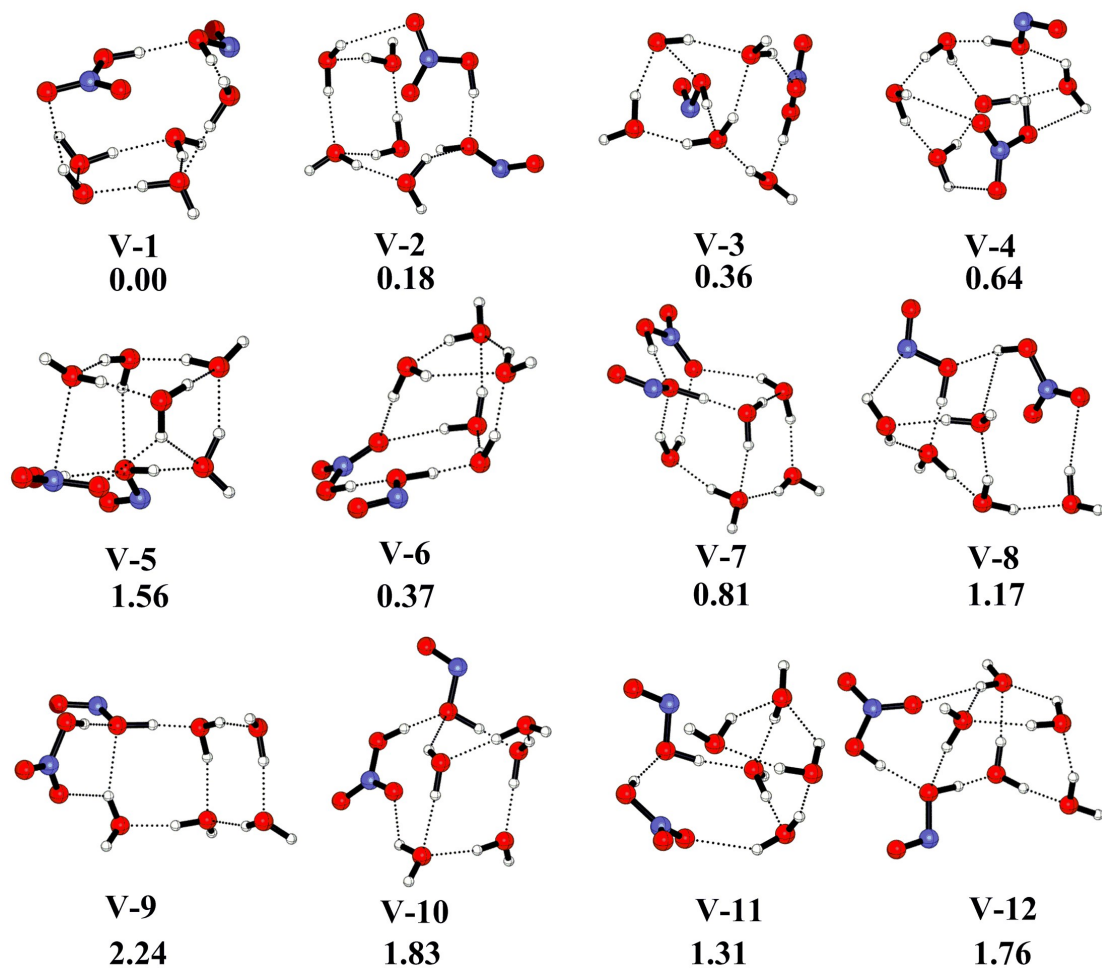

**Figure S6.** The geometrical configurations of  $(\text{HNO}_3)(\text{HONO})(\text{H}_2\text{O})_5$  optimized at the M06-2X/6-311+G(2d,p) level. The underlying figures are relative binding energies compared with the V-1 (in kcal/mol).

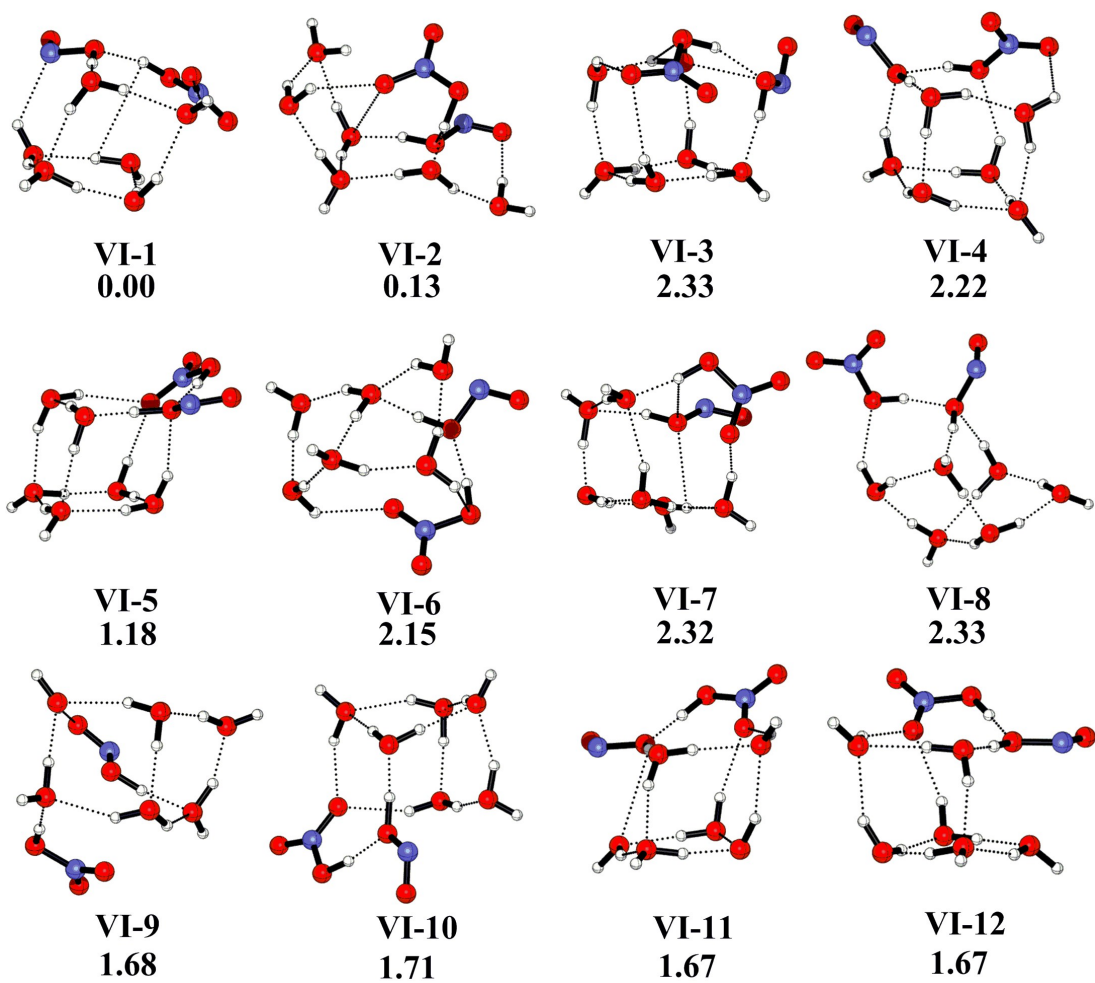

**Figure S7.** The geometrical configurations of  $(\text{HNO}_3)(\text{HONO})(\text{H}_2\text{O})_6$  optimized at the M06-2X/6-311+G(2d,p) level. The underlying figures are relative binding energies compared with the VI-1 (in kcal/mol).

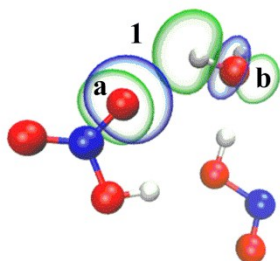

$LP(O_a) \rightarrow \sigma^*(O_b-H)$   
I-1 (0.84 kcal/mol)

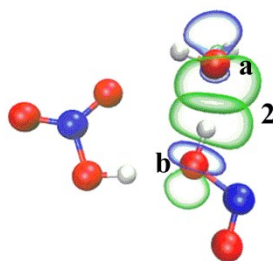

$LP(O_a) \rightarrow \sigma^*(O_b-H)$   
I-1 (27.26 kcal/mol)

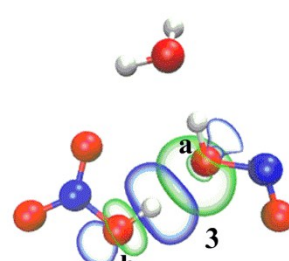

$LP(O_a) \rightarrow \sigma^*(O_b-H)$   
I-1 (15.10 kcal/mol)

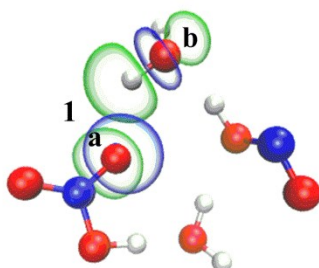

$LP(O_a) \rightarrow \sigma^*(O_b-H)$   
II-1 (4.84 kcal/mol)

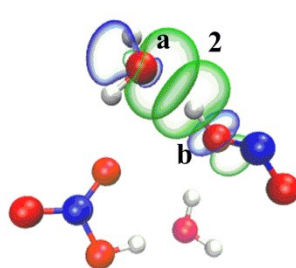

$LP(O_a) \rightarrow \sigma^*(O_b-H)$   
II-1 (29.34 kcal/mol)

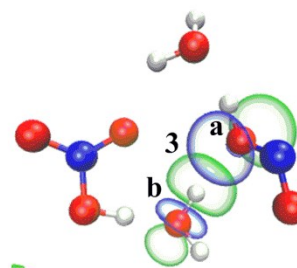

$LP(O_a) \rightarrow \sigma^*(O_b-H)$   
II-1 (7.97 kcal/mol)

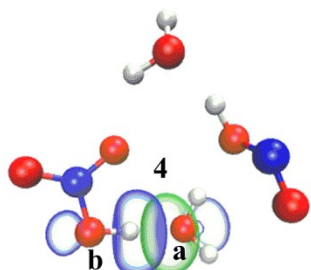

$LP(O_a) \rightarrow \sigma^*(O_b-H)$   
II-1 (53.02 kcal/mol)

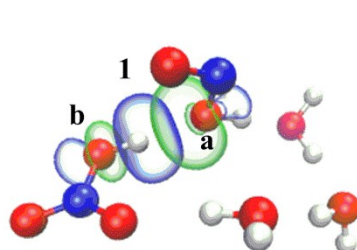

$LP(O_a) \rightarrow \sigma^*(O_b-H)$   
III-1 (19.66 kcal/mol)

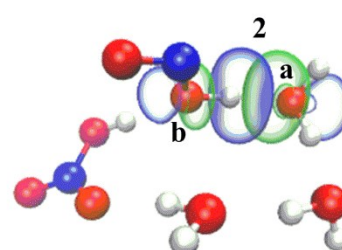

$LP(O_a) \rightarrow \sigma^*(O_b-H)$   
III-1 (52.50 kcal/mol)

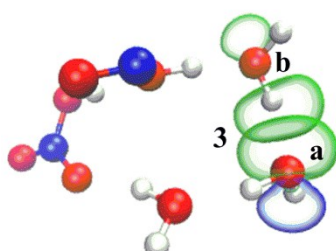

$LP(O_a) \rightarrow \sigma^*(O_b-H)$   
III-1 (23.53 kcal/mol)

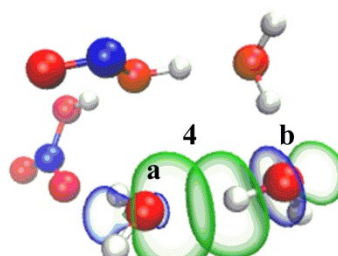

$LP(O_a) \rightarrow \sigma^*(O_b-H)$   
III-1 (13.90 kcal/mol)

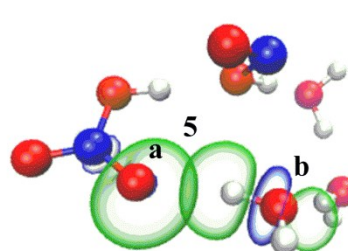

$LP(O_a) \rightarrow \sigma^*(O_b-H)$   
III-1 (5.52 kcal/mol)

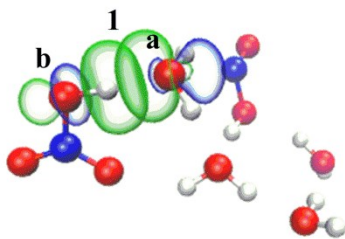

LP(O<sub>a</sub>) → σ\* (O<sub>b</sub>-H)  
IV-1 (51.00 kcal/mol)

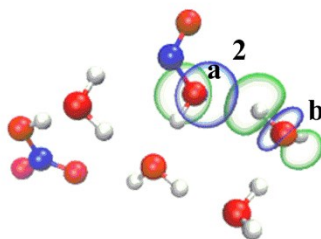

LP(O<sub>a</sub>) → σ\* (O<sub>b</sub>-H)  
IV-1 (4.46 kcal/mol)

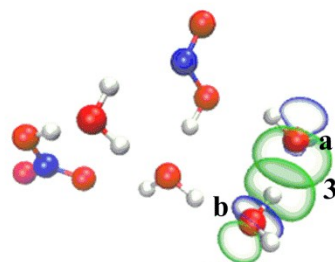

LP(O<sub>a</sub>) → σ\* (O<sub>b</sub>-H)  
IV-1 (13.84 kcal/mol)

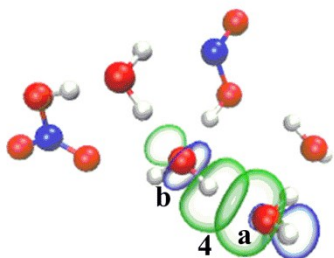

LP(O<sub>a</sub>) → σ\* (O<sub>b</sub>-H)  
IV-1 (23.10 kcal/mol)

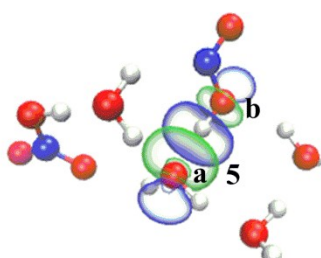

LP(O<sub>a</sub>) → σ\* (O<sub>b</sub>-H)  
IV-1 (35.48 kcal/mol)

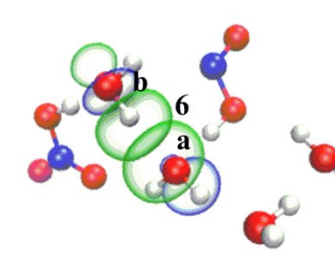

LP(O<sub>a</sub>) → σ\* (O<sub>b</sub>-H)  
IV-1 (11.31 kcal/mol)

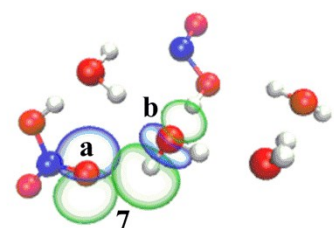

LP(O<sub>a</sub>) → σ\* (O<sub>b</sub>-H)  
IV-1 (1.72 kcal/mol)

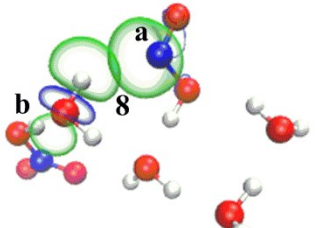

LP(N<sub>a</sub>) → σ\* (O<sub>b</sub>-H)  
IV-1 (1.19 kcal/mol)

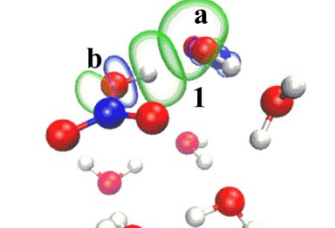

LP(O<sub>a</sub>) → σ\* (O<sub>b</sub>-H)  
V-1 (24.39 kcal/mol)

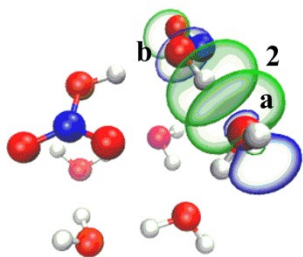

LP(O<sub>a</sub>) → σ\* (O<sub>b</sub>-H)  
V-1 (41.44 kcal/mol)

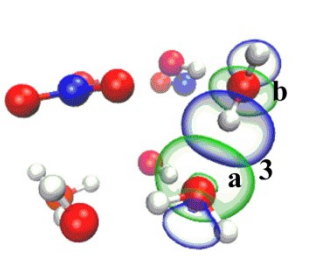

LP(O<sub>a</sub>) → σ\* (O<sub>b</sub>-H)  
V-1 (14.71 kcal/mol)

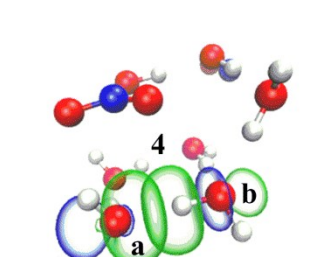

LP(O<sub>a</sub>) → σ\* (O<sub>b</sub>-H)  
V-1 (30.13 kcal/mol)

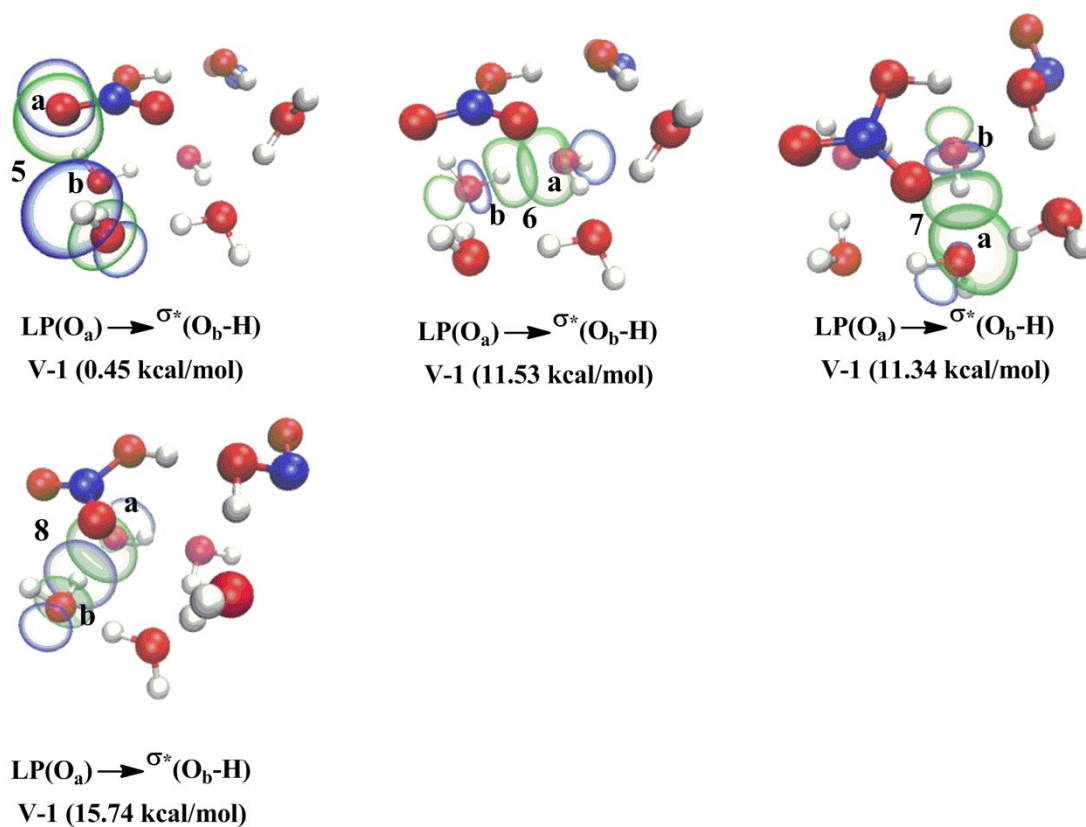

**Figure S8.** Natural bond orbital (NBO) analysis of donor–acceptor orbital interactions in I-1, II-1, III-1, IV-1 and V-1 ( $0.05 \text{ e } \text{\AA}^{-3}$  isosurface from M06-2X/6-311+G(2d,p) model chemistry). The second-order stabilisation energies are given in parentheses.



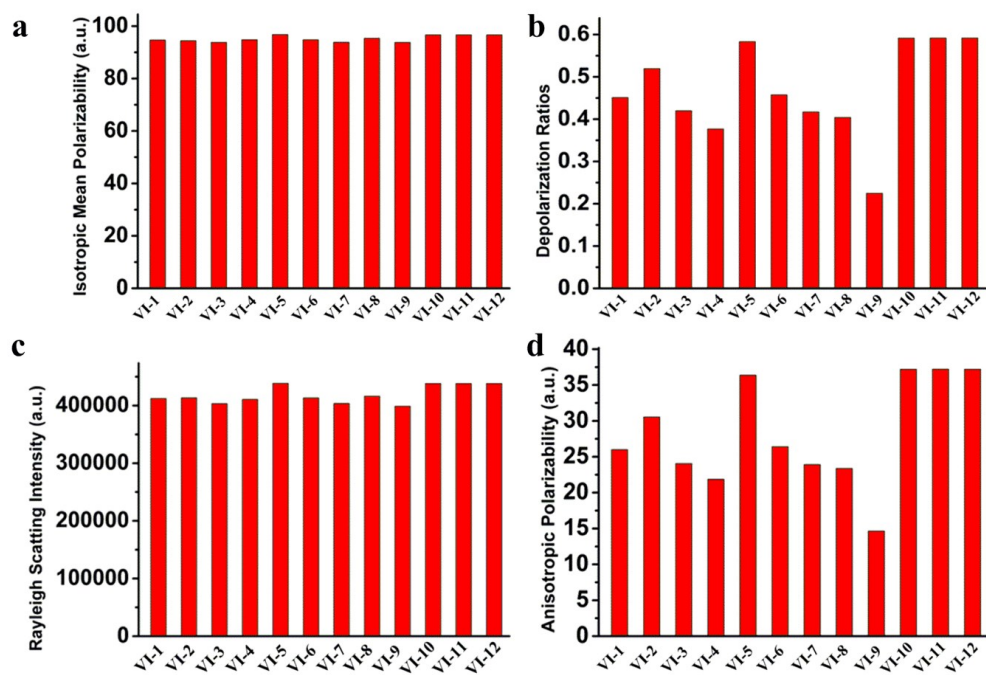

**Figure S9.** The Rayleigh light scattering and cluster polarizability properties of different isomers of  $(\text{HNO}_3)(\text{HONO})(\text{H}_2\text{O})_6$ : (a) isotropic mean polarizabilities; (b) depolarization ratios; (c) Rayleigh light scattering intensities; (d) anisotropic polarizabilities.
